# Supplementary material for: Circulating Alpha-Tocopherol Levels, Bone Mineral Density, and Fracture: Mendelian Randomization Study
Source: MDPI journal article supplement (doi:10.3390/nu13061940), 2021-06-05
Supplement: s1 [file s1]

**Supplementary Table S1.** Summary statistics data for the associations of the single-nucleotide polymorphisms with  $\alpha$ -tocopherol and their associations with bone mineral density and any fracture

| SNP        | Chr | Nearby gene        | EA | OA | Association with $\alpha$ -tocopherol |      |         | Association with BMD |         |         | Association with any fracture |         |         |
|------------|-----|--------------------|----|----|---------------------------------------|------|---------|----------------------|---------|---------|-------------------------------|---------|---------|
|            |     |                    |    |    | Beta*                                 | SE   | P-value | Beta*                | SE      | P-value | Beta*                         | SE      | P-value |
| rs964184   | 11  | BUD13/ZNF259/APOA5 | G  | C  | 0.04                                  | 0.01 | 7.8E-12 | 0.00186              | 0.00271 | 0.49    | 0.00376                       | 0.00964 | 0.70    |
| rs2108622  | 19  | CYP4F2             | T  | C  | 0.03                                  | 0.01 | 1.4E-10 | 0.01279              | 0.00202 | 2.3E-10 | -0.00348                      | 0.00712 | 0.63    |
| rs11057830 | 12  | SCARB1             | A  | G  | 0.03                                  | 0.01 | 8.2E-9  | 0.01238              | 0.00268 | 3.9E-06 | -0.01302                      | 0.00949 | 0.17    |

BMD, bone mineral density; Chr, chromosome; EA, effect allele; OA, other allele; SE, standard error; SNP, single-nucleotide polymorphism.

\*The beta coefficients are in log-transformed mg/L for  $\alpha$ -tocopherol, g/cm<sup>2</sup> for bone mineral density, and log-odds ratios for fracture.
